# Supplementary material for: Amaryllidaceae Alkaloids of Different Structural Types from Narcissus L. cv. Professor Einstein and Their Cytotoxic Activity
Source: PubMed Central journal article supplement (PMC7076679; doi:10.3390/plants9020137), 2020-01-22

# Supplementary Material

## Amaryllidaceae alkaloids of different structural types from *Narcissus* L. cv. Professor Einstein and their cytotoxic activity

Kateřina Breiterová<sup>1</sup>, Darja Koutová<sup>2</sup>, Jana Mařiková<sup>3</sup>, Radim Havelek<sup>2</sup>, Jiří Kuneš<sup>3</sup>, Martina Majorošová<sup>2</sup>, Lubomír Opletal<sup>1</sup>, Anna Hošťálková<sup>1</sup>, Jaroslav Jenčo<sup>1</sup>, Martina Řezáčová<sup>2</sup>, Lucie Cahlíková<sup>1\*</sup>

<sup>1</sup> ADINACO Research Group, Department of Pharmaceutical Botany, Faculty of Pharmacy, Charles University, Heyrovského 1203, 500 05 Hradec Králové, Czech Republic

<sup>2</sup> Department of Medical Biochemistry, Faculty of Medicine in Hradec Králové, Charles University, Šimkova 870, 500 03 Hradec Králové, Czech Republic

<sup>3</sup> Department of Organic and Bioorganic Chemistry, Faculty of Pharmacy, Charles University, Heyrovského 1203, 500 05 Hradec Králové, Czech Republic

---

### Table of contents

---

|                                                                                                                     |   |
|---------------------------------------------------------------------------------------------------------------------|---|
| Figure S1 GS/MS analysis of alkaloidal extract of <i>Narcissus</i> cv. Professor Einstein .....                     | 2 |
| Table S1 Alkaloids identified by GC/MS in fresh bulbs of <i>Narcissus</i> cv. Professor Einstein ....               | 3 |
| Figure S2-1 <sup>1</sup> H NMR spectra of 9- <i>O</i> -demethylmaritidine ( <b>21</b> ) in CDCl <sub>3</sub> .....  | 4 |
| Figure S2-2 <sup>13</sup> C NMR spectra of 9- <i>O</i> -demethylmaritidine ( <b>21</b> ) in CDCl <sub>3</sub> ..... | 4 |
| Figure S3-1 ESI-HRMS spectra of new alkaloid 7-oxonorpluviine ( <b>24</b> ) .....                                   | 5 |
| Figure S3-2 <sup>1</sup> H NMR spectra of new alkaloid 7-oxonorpluviine ( <b>24</b> ) in CD <sub>3</sub> OD .....   | 5 |
| Figure S3-3 <sup>13</sup> C NMR spectra of new alkaloid 7-oxonorpluviine ( <b>24</b> ) in CD <sub>3</sub> OD.....   | 6 |
| Figure S3-4 gCOSY spectra of new alkaloid 7-oxonorpluviine ( <b>24</b> ) in CD <sub>3</sub> OD .....                | 6 |
| Figure S3-5 gHSQC spectra of new alkaloid 7-oxonorpluviine ( <b>24</b> ) in CD <sub>3</sub> OD .....                | 7 |
| Figure S3-6 gHMBC spectra of new alkaloid 7-oxonorpluviine ( <b>24</b> ) in CD <sub>3</sub> OD.....                 | 7 |
| Figure S3-7 NOESY spectra of new alkaloid 7-oxonorpluviine ( <b>24</b> ) in CD <sub>3</sub> OD.....                 | 8 |

**Figure S1** GS/MS analysis of alkaloidal extract of *Narcissus* cv. Professor Einstein

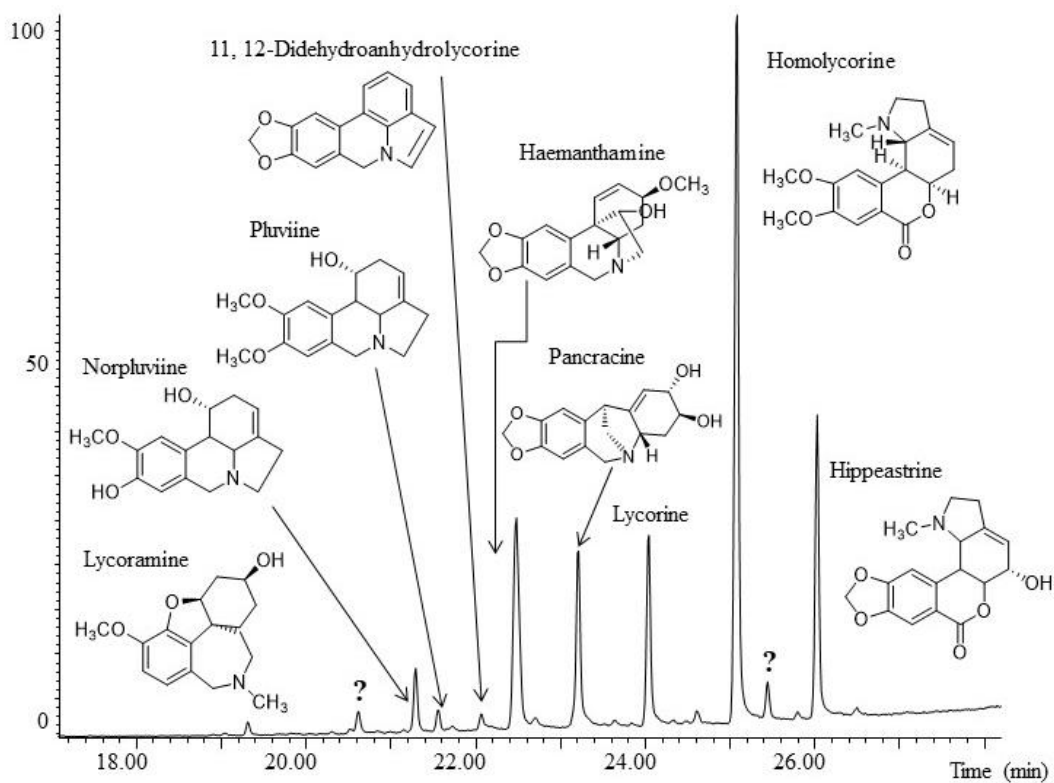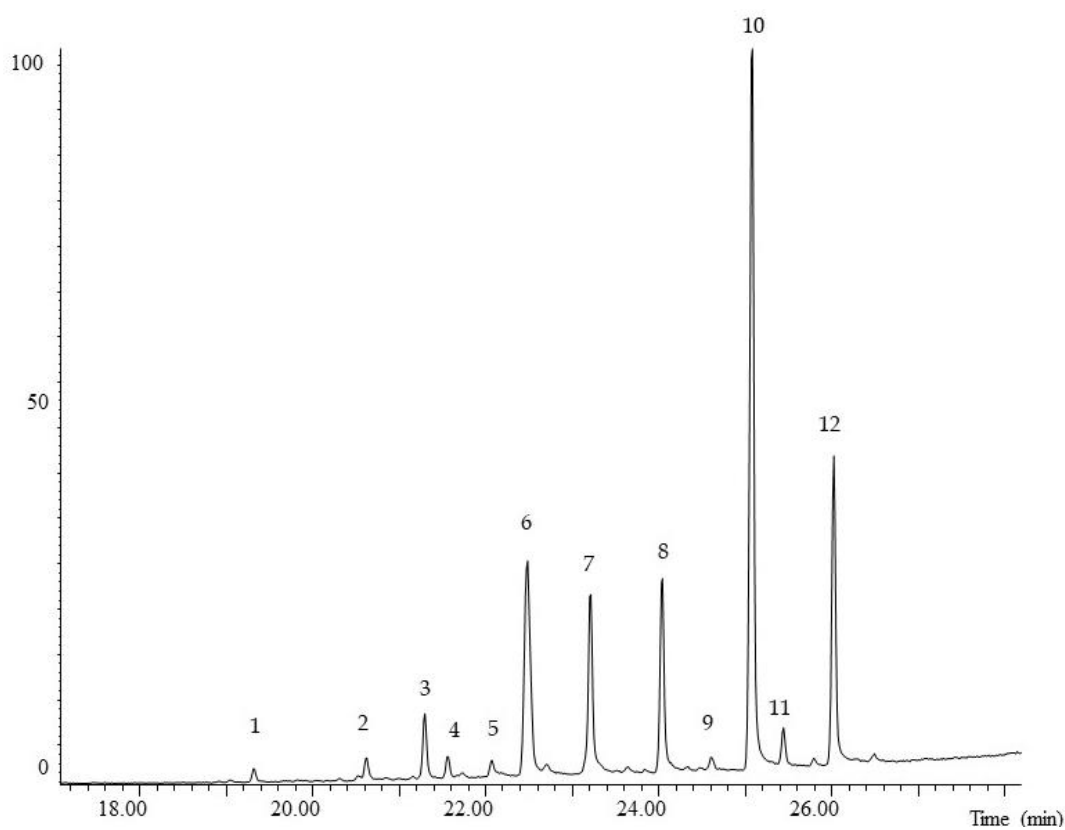

**Table S1** Alkaloids identified by GC/MS in fresh bulbs of *Narcissus* cv. Professor Einstein

| Compound                             | RT (min) | [M+] and characteristic ions, <i>m/z</i> (% of relative intensity)      | %  | Ref. for MS |
|--------------------------------------|----------|-------------------------------------------------------------------------|----|-------------|
| 1. Lycoramine                        | 19.314   | 289(65), 288(100), 274(10), 232(10), 202(30)                            | tr | NIST 11     |
| 2. A1                                | 20.625   | ?177(7), 109(100)                                                       | 1  |             |
| 3. Norpluviine                       | 21.299   | 273(75), 273(33), 254(42), 242(6), 229(50), 228(100), 241(5)            | 3  | NIST 11     |
| 4. Pluviine                          | 21.569   | 287(81), 286(48), 268(52), 254(15), 243(66), 242(100), 228(23)          | 1  | NIST 11     |
| 5. 11, 12- Didehydroanhydrolycorine  | 22.076   | 249(59), 248(100), 190(25), 163(7), 95(15)                              | 1  | [1]         |
| 6. Haemanthamine                     | 22.486   | 301(15), 272(100), 240(15), 225(5), 211(15)                             | 16 | NIST 11     |
| 7. Pancracine                        | 23.216   | 287(100), 286(20), 270(17), 243(17), 223(15), 214(16), 199(18), 185(26) | 11 | NIST 11     |
| 8. Lycorine                          | 24.046   | 287(30), 268(24), 250(32), 227(68), 226(100), 211(5), 147(9)            | 10 | NIST 11     |
| 9. 9- <i>O</i> -Methylpseudolycorine | 24.604   | 303(35), 284(24), 243(86), 242(100)                                     | <1 | NIST 11     |
| 10. Homolycorine                     | 25.086   | 301(-), 207(1), 178(3), 110(8), 109(100), 108(20), 94(3), 82(3)         | 39 | [2]         |
| 11. A2                               | 25.450   | 329(31), 269(76), 268(100), 250(93), 240(16), 226(81), 211(12), 147(15) | 2  |             |
| 12. Hippeastrine                     | 26.033   | 315(-), 162(4), 134(4), 125(100), 96(36), 82(3)                         | 15 | [1]         |

- Havlasová, J.; Šafratová, M.; Siatka, T.; Štěpánková, Š.; Novák, Z.; Ločárek, M.; Opletal, L.; Hrabínová, M.; Jun, D.; Benešová, N.; Kuneš, J.; Cahlíková, L. Chemical Composition of Bioactive Alkaloid Extracts from Some *Narcissus* Species and Varieties and their Biological Activity. *Nat. Prod. Commun.* **2014**, *9*, 1151-1155.
- Cahlíková, L.; Ločárek, M.; Benešová, N.; Kučera, R.; Chlebek, J.; Novák, Z.; Opletal, L. Isolation and Cholinesterase Inhibitory Activity of *Narcissus* Extracts and Amaryllidaceae Alkaloids. *Nat. Prod. Commun.* **2013**, *8*, 781-785.

Figure S2-1 <sup>1</sup>H NMR spectra of 9-O-demethylmaritidine (**21**) in CDCl<sub>3</sub>

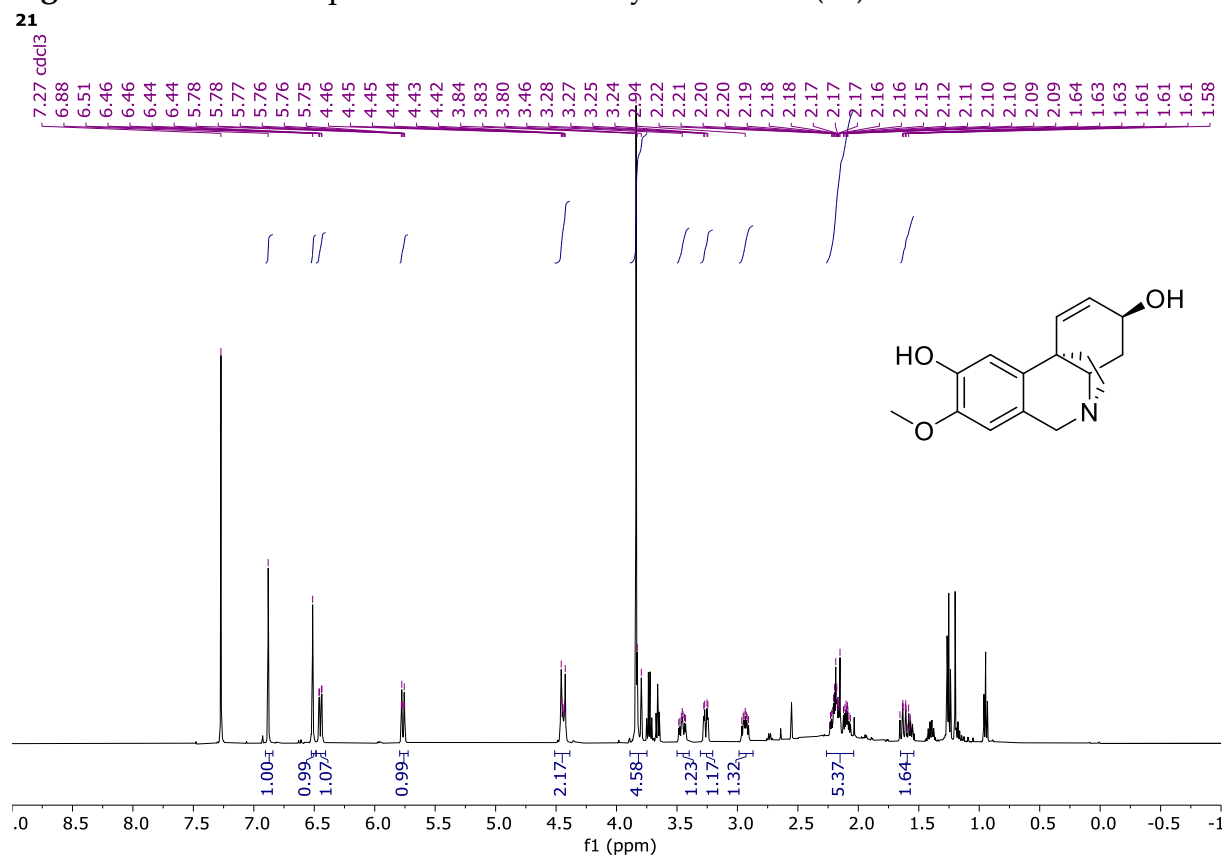

Figure S2-2 <sup>13</sup>C NMR spectra of 9-O-demethylmaritidine (**21**) in CDCl<sub>3</sub>

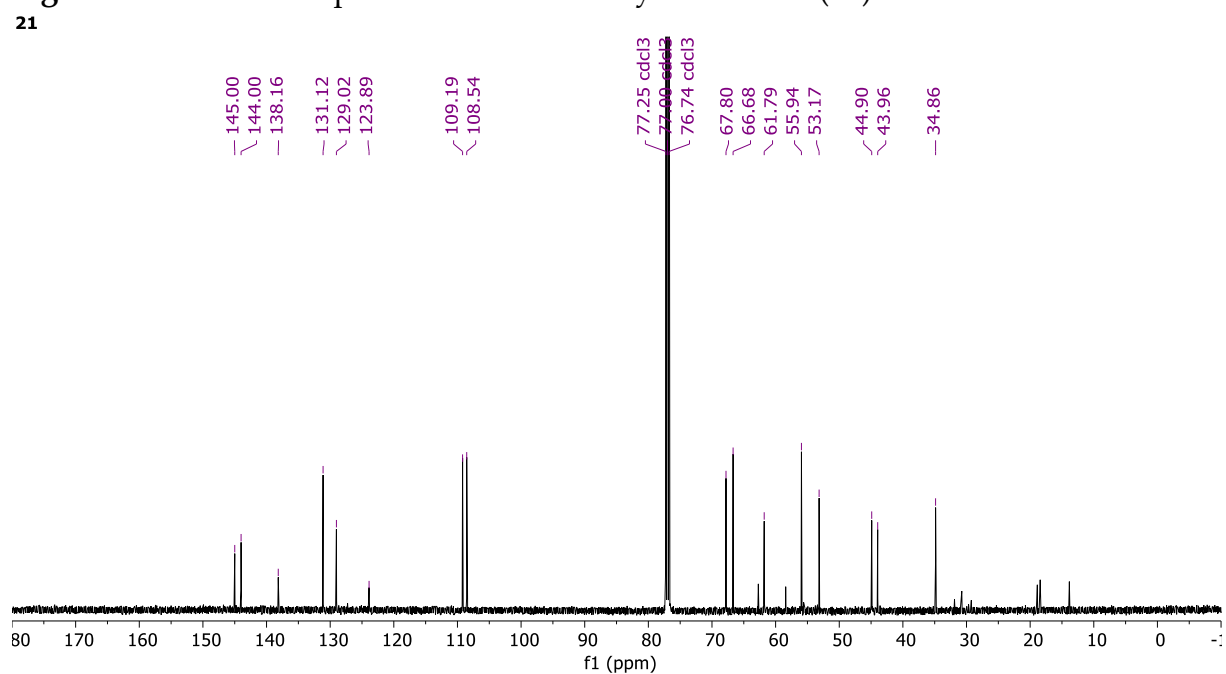

Figure S3-1 ESI-HRMS spectra of new alkaloid 7-oxonorpluviine (24)

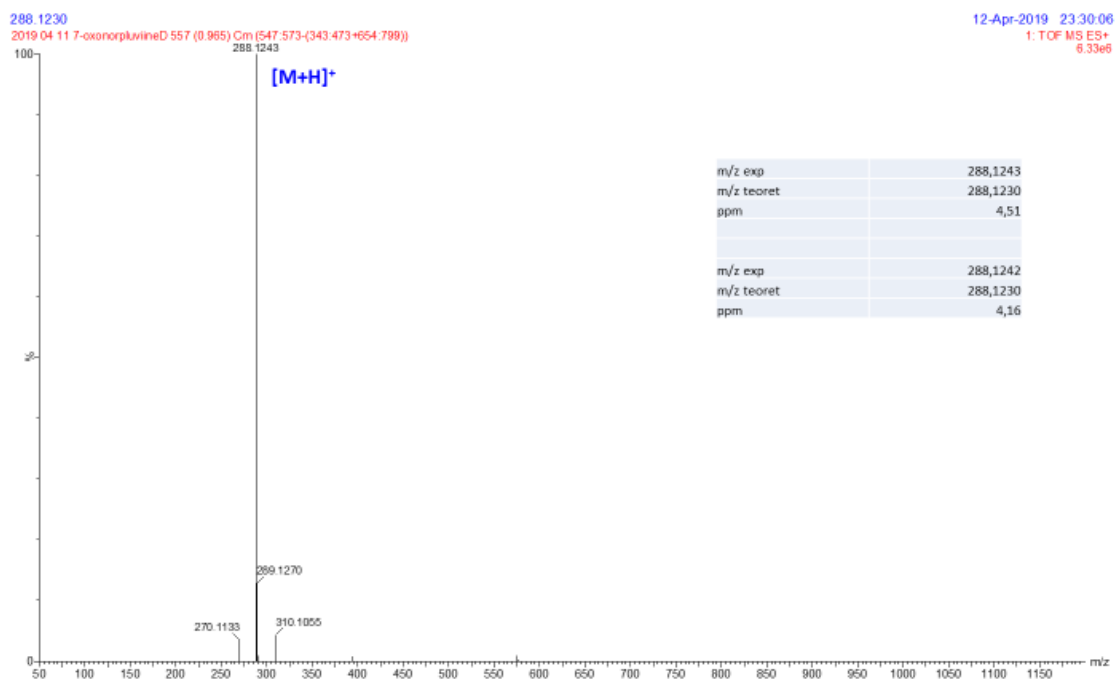

Figure S3-2  $^1\text{H}$  NMR spectra of new alkaloid 7-oxonorpluviine (24) in  $\text{CD}_3\text{OD}$

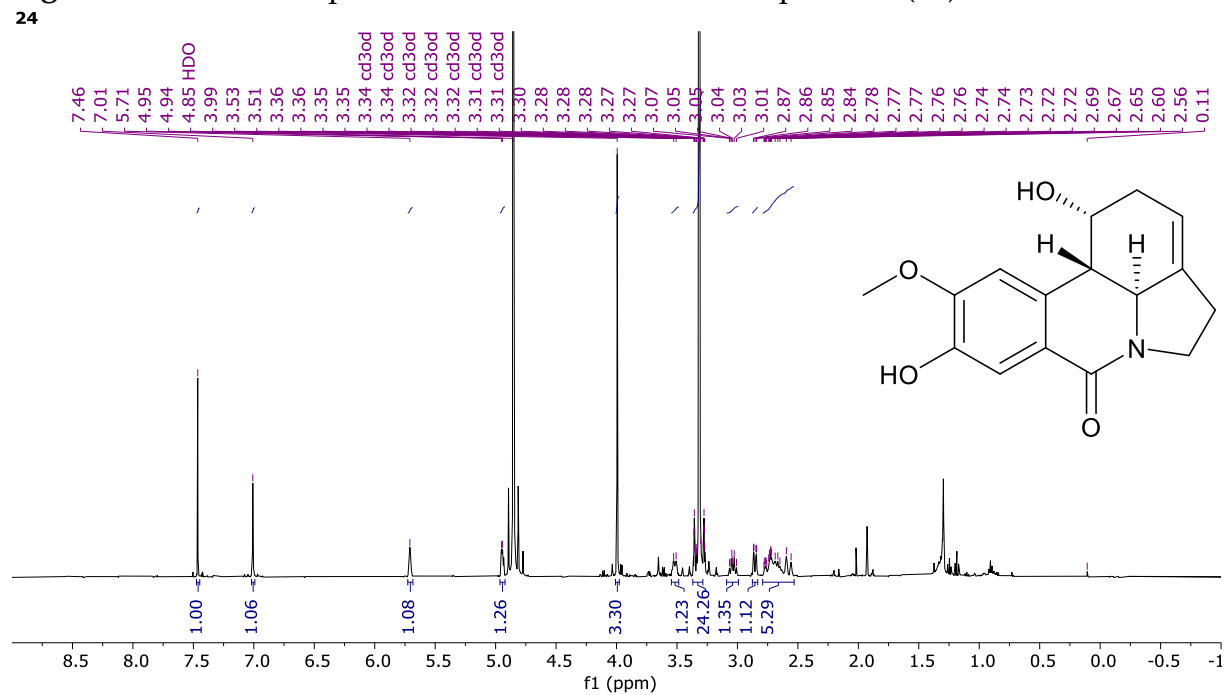

**Figure S3-3**  $^{13}\text{C}$  NMR spectra of new alkaloid 7-oxonorpluviine (**24**) in  $\text{CD}_3\text{OD}$

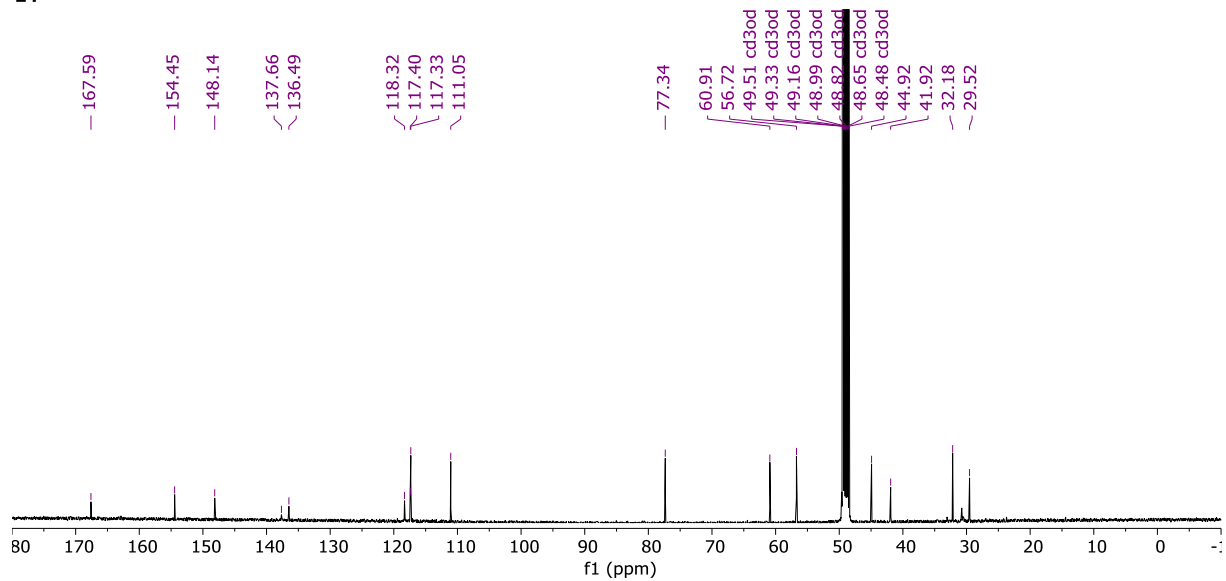

**Figure S3-4** gCOSY spectra of new alkaloid 7-oxonorpluviine (**24**) in  $\text{CD}_3\text{OD}$

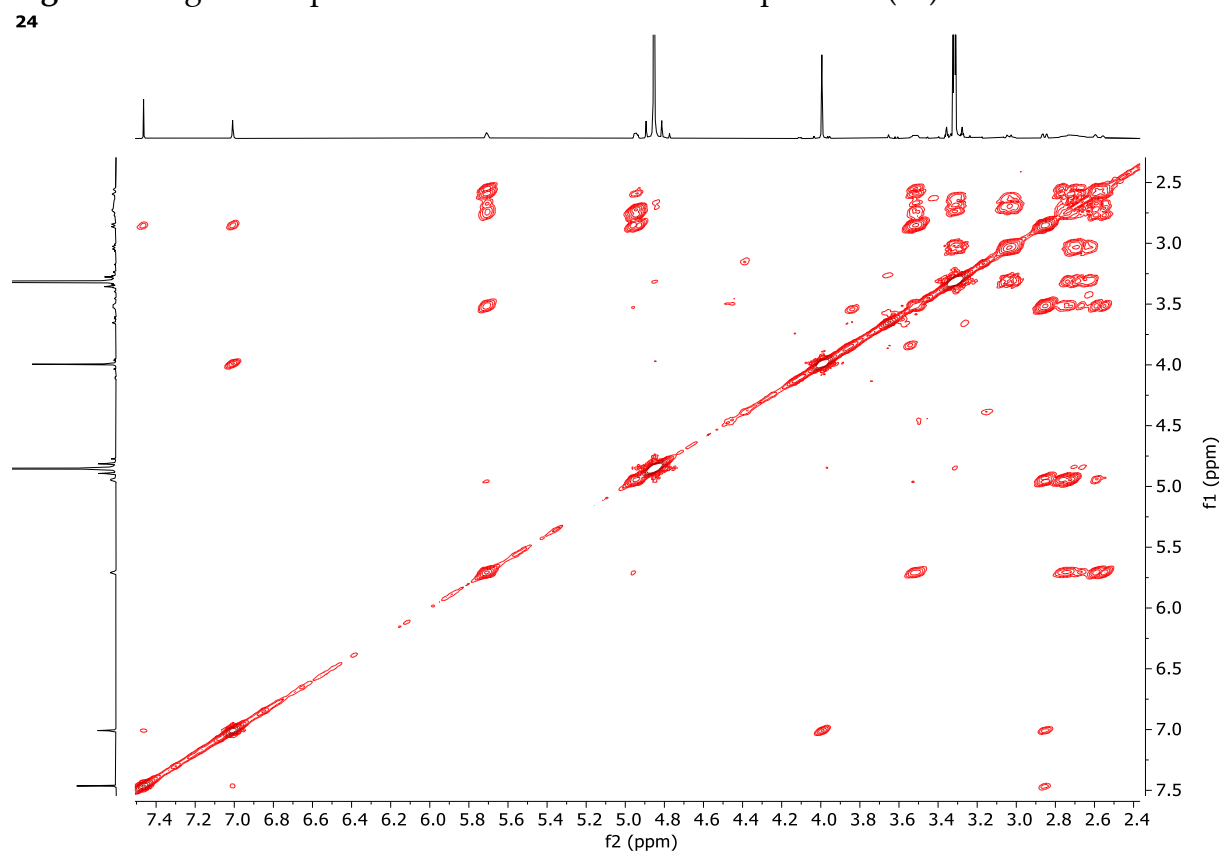

Figure S3-5 gHSQC spectra of new alkaloid 7-oxonorpluviine (**24**) in CD<sub>3</sub>OD

24

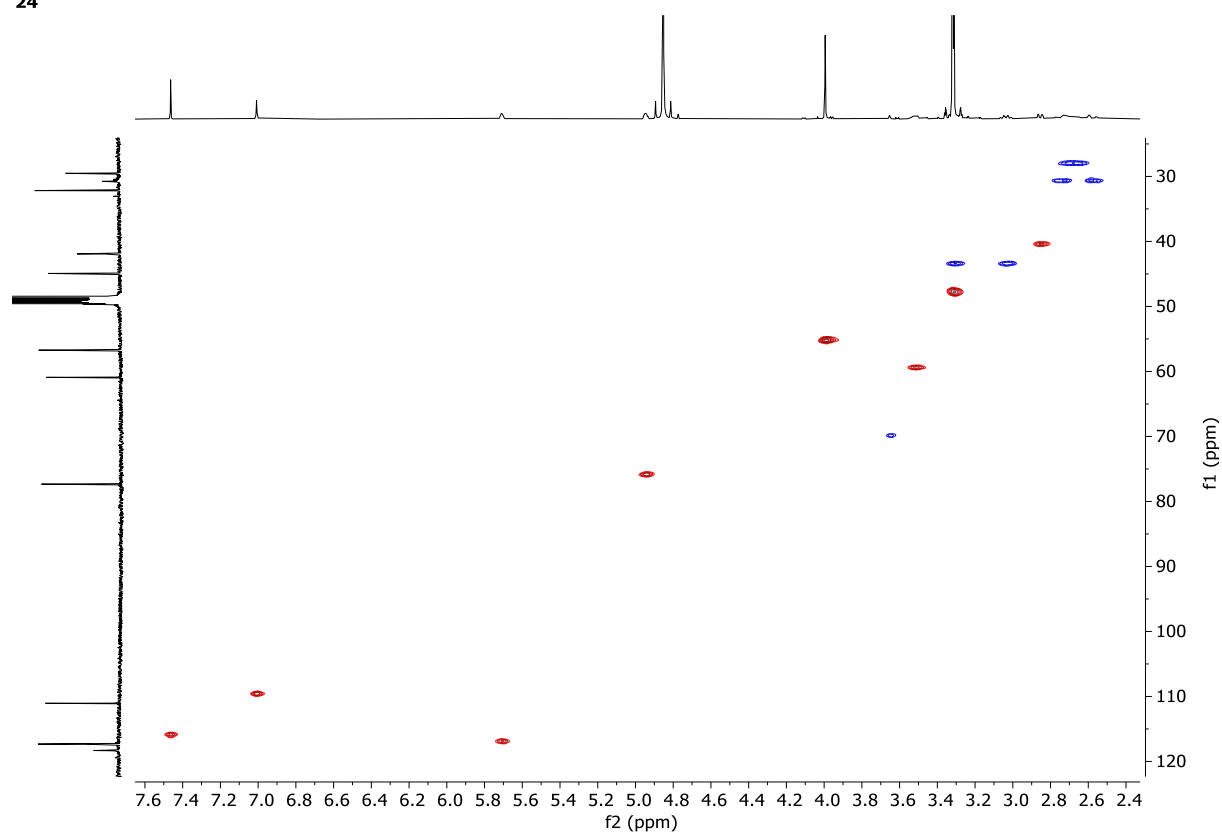

Figure S3-6 gHMBC spectra of new alkaloid 7-oxonorpluviine (**24**) in CD<sub>3</sub>OD

24

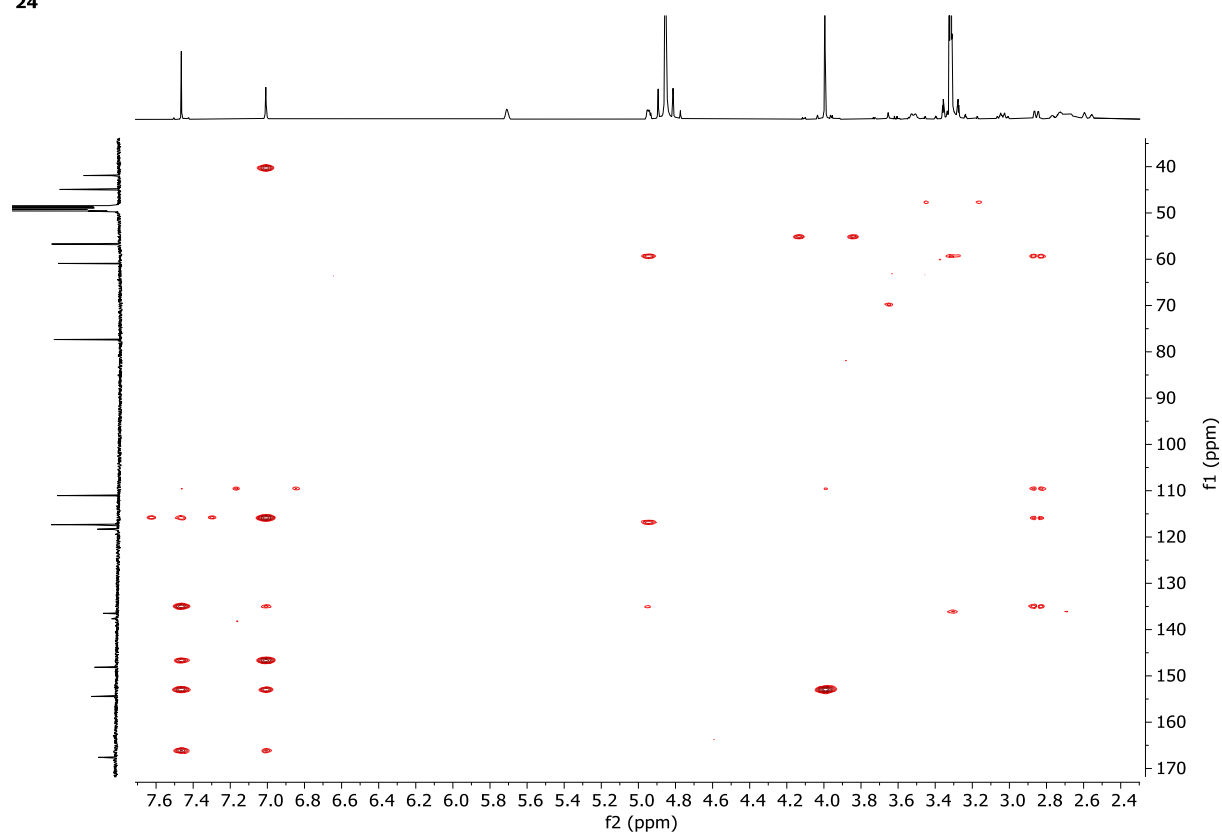

Figure S3-7 NOESY spectra of new alkaloid 7-oxonorpluviine (**24**) in CD<sub>3</sub>OD

24

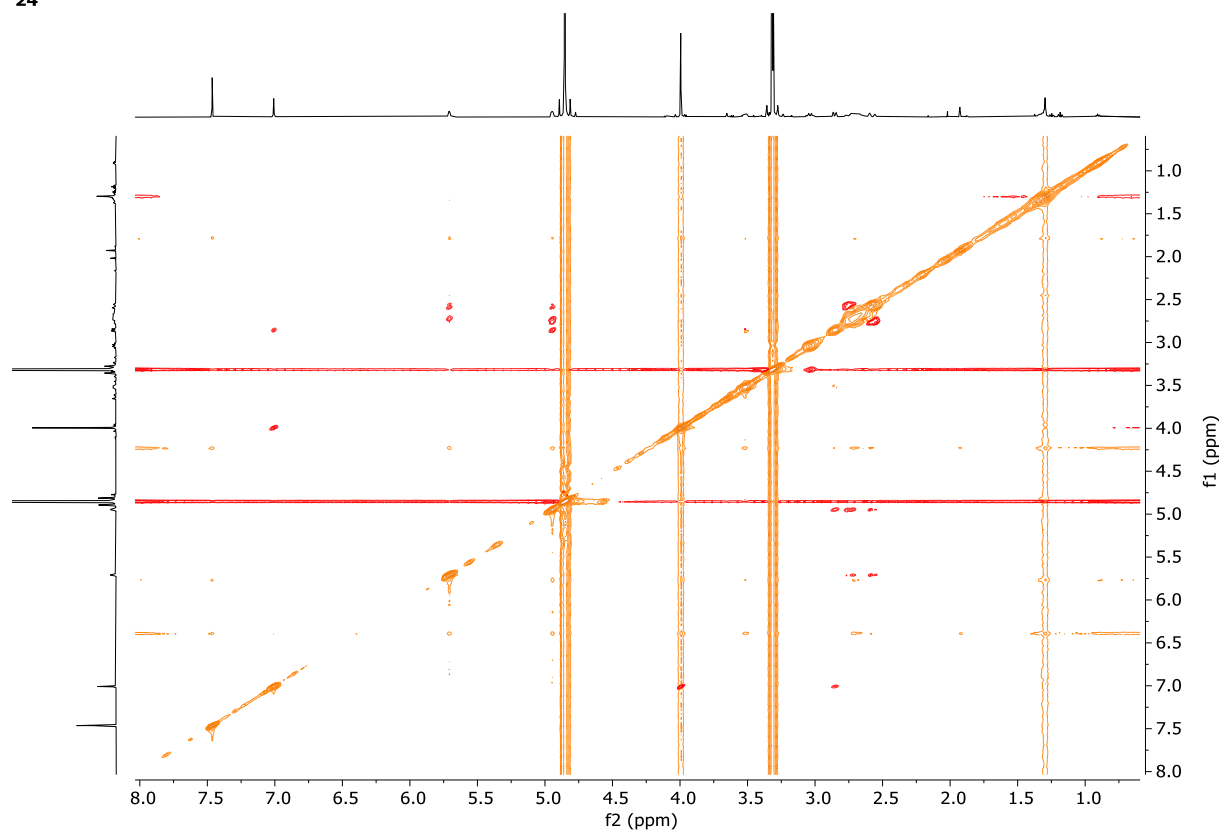

Supplement: plants-09-00137-s001.pdf [file plants-09-00137-s001.pdf]
